# Supplementary material for: High-throughput mRNA and miRNA profiling of epithelial-mesenchymal transition in MDCK cells
Source: PubMed Central journal article supplement (PMC4647640; doi:10.1186/s12864-015-2036-9), 2015-11-16
Supplement: 12864_2015_2036_MOESM4_ESM.pdf [file 12864_2015_2036_MOESM4_ESM.pdf]

**Supplementary Table S1: RNA-Seq raw, quality controlled and aligned reads**

| <b>samples</b> | <b>lane 1</b> | <b>lane 2</b> | <b>lane 3</b> | <b>lane 4</b> | <b>total raw reads</b> | <b>quality controlled reads</b> | <b>reads uniquely mapped in proper pair</b> |
|----------------|---------------|---------------|---------------|---------------|------------------------|---------------------------------|---------------------------------------------|
| MDCK 1         | 24.2          | 9.2           | 22.5          | 25.4          | 81.3                   | 78.2                            | 66.7                                        |
| MDCK 2         | 8.1           | 1.6           | 7.4           | 8.2           | 25.3                   | 24.3                            | 20.5                                        |
| MDCK 3         | 16.4          | 6.4           | 14.9          | 17.2          | 54.9                   | 53.0                            | 42.7                                        |
| MDCK 4         | 11.8          | 2.4           | 10.6          | 11.8          | 36.6                   | 35.3                            | 26.3                                        |
| MDCK-Ras 1     | 16.4          | 6.2           | 14.9          | 17.2          | 54.7                   | 52.5                            | 43.4                                        |
| MDCK-Ras 2     | 12.5          | 3.4           | 11.6          | 13.0          | 40.5                   | 38.9                            | 32.5                                        |
| MDCK-Ras 3     | 18.3          | 7.5           | 16.7          | 19.3          | 61.8                   | 59.6                            | 49.4                                        |
| MDCK-Ras 4     | 21.1          | 6.1           | 19.8          | 21.5          | 68.5                   | 65.5                            | 54.5                                        |
| Total          | 128.8         | 42.8          | 118.4         | 133.6         | 423.6                  | 407.3                           | 336.0                                       |
