# Supplementary material for: High-throughput mRNA and miRNA profiling of epithelial-mesenchymal transition in MDCK cells
Source: PubMed Central journal article supplement (PMC4647640; doi:10.1186/s12864-015-2036-9), 2015-11-16
Supplement: 12864_2015_2036_MOESM5_ESM.pdf [file 12864_2015_2036_MOESM5_ESM.pdf]

**Supplementary Table S2: RNA-Seq gene counts.**

---

|                                                                |             |
|----------------------------------------------------------------|-------------|
| Total genes in dog genome (CanFam 3 release)                   | 24580       |
| Genes detected in our RNA-Seq data                             | 12130       |
| Significantly differentially expressed genes (p<0.05)          | 4705 (3379) |
| Significantly differentially expressed MDCK specific genes     | 2276 (1555) |
| Significantly differentially expressed MDCK-Ras specific genes | 2429 (1824) |

---
