# Supplementary material for: High-throughput mRNA and miRNA profiling of epithelial-mesenchymal transition in MDCK cells
Source: PubMed Central journal article supplement (PMC4647640; doi:10.1186/s12864-015-2036-9), 2015-11-16
Supplement: 12864_2015_2036_MOESM8_ESM.pdf [file 12864_2015_2036_MOESM8_ESM.pdf]

**Supplementary Table S3: miRNA-Seq raw, quality controlled and aligned reads:**

| <b>samples</b> | <b>total raw reads</b> | <b>quality control 1:<br/>adaptor removed</b> | <b>quality control 2:<br/>quality based trimming</b> | <b>quality control 3:<br/>length based<br/>filtering</b> | <b>quality control 4:<br/>Rfam based<br/>filtering</b> | <b>mapped</b> |
|----------------|------------------------|-----------------------------------------------|------------------------------------------------------|----------------------------------------------------------|--------------------------------------------------------|---------------|
| MDCK 1         | 32.5                   | 20.2                                          | 18.8                                                 | 18.2                                                     | 17.5                                                   | 17.3          |
| MDCK 2         | 42.5                   | 21.9                                          | 21.6                                                 | 20.7                                                     | 19.5                                                   | 19.0          |
| MDCK 3         | 18.0                   | 9.9                                           | 8.9                                                  | 8.5                                                      | 8.3                                                    | 8.1           |
| MDCK 4         | 22.1                   | 14.3                                          | 12.9                                                 | 12.3                                                     | 12.0                                                   | 11.3          |
| MDCK-Ras 1     | 30.0                   | 16.5                                          | 14.7                                                 | 14.3                                                     | 14.0                                                   | 13.9          |
| MDCK-Ras 2     | 14.1                   | 9.0                                           | 8.5                                                  | 8.2                                                      | 8.0                                                    | 6.6           |
| MDCK-Ras 3     | 25.0                   | 16.9                                          | 16.2                                                 | 15.7                                                     | 15.4                                                   | 15.2          |
| MDCK-Ras 4     | 23.0                   | 14.2                                          | 13.0                                                 | 12.6                                                     | 12.1                                                   | 11.8          |
| Total          | 207.2                  | 122.9                                         | 114.6                                                | 110.5                                                    | 106.8                                                  | 103.2         |
