# Supplementary material for: High-throughput mRNA and miRNA profiling of epithelial-mesenchymal transition in MDCK cells
Source: PubMed Central journal article supplement (PMC4647640; doi:10.1186/s12864-015-2036-9), 2015-11-16

**A**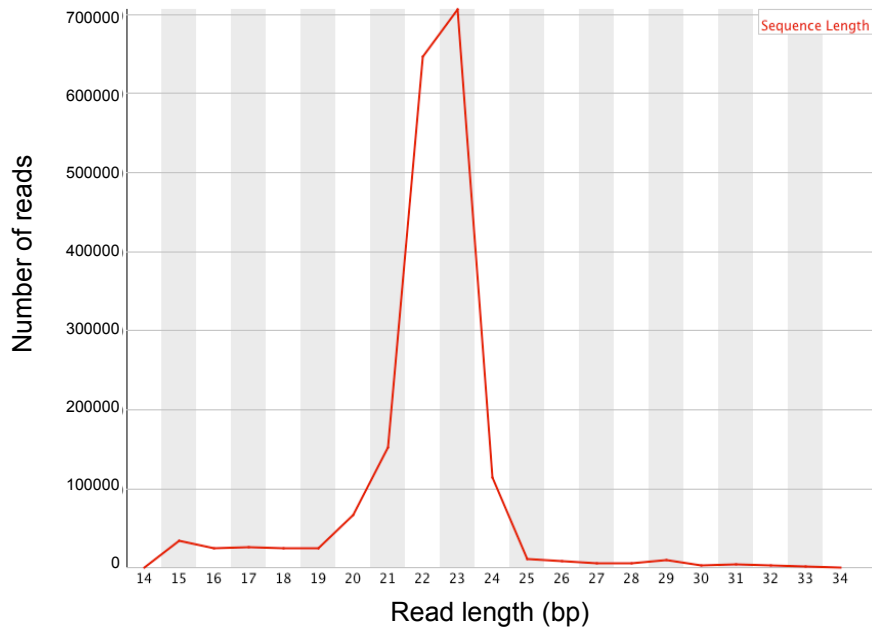**B**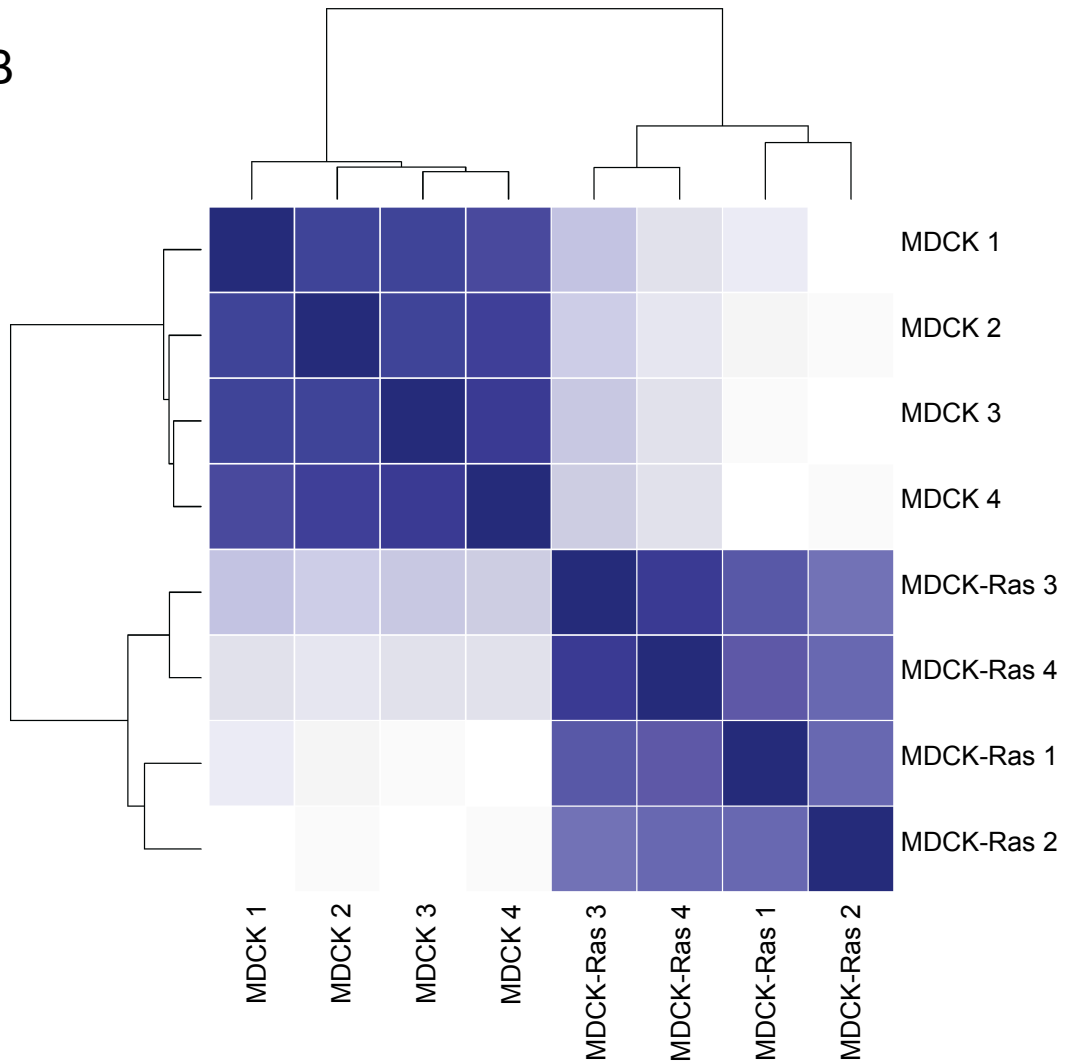

Supplement: 12864_2015_2036_MOESM9_ESM.pdf [file 12864_2015_2036_MOESM9_ESM.pdf]
