# Supplementary material for: High-throughput mRNA and miRNA profiling of epithelial-mesenchymal transition in MDCK cells
Source: PubMed Central journal article supplement (PMC4647640; doi:10.1186/s12864-015-2036-9), 2015-11-16
Supplement: 12864_2015_2036_MOESM10_ESM.pdf [file 12864_2015_2036_MOESM10_ESM.pdf]

**Supplementary Table S4: miRNA-Seq gene counts**

| <b>organism</b> | <b>miRBase<br/>(release 21)</b> | <b>found<br/>(detected/<br/>predicted)</b> | <b>differentially<br/>expressed<br/>(p&lt;0.05)</b> | <b>MDCK</b> | <b>MDCK-Ras</b> |
|-----------------|---------------------------------|--------------------------------------------|-----------------------------------------------------|-------------|-----------------|
| canis           | 453                             | 219                                        | 80 (73)                                             | 36 (34)     | 44 (39)         |
| human           | 2588                            | 94                                         | 2 (2)                                               | 2 (2)       | 0 (0)           |
| rest species    | 32787                           | 42                                         | 3 (3)                                               | 3 (3)       | 0 (0)           |
| novel           | -                               | 25                                         | 2 (2)                                               | 1 (1)       | 1 (1)           |
